# Supplementary material
Source: PubMed Central journal article supplement (PMC1502476)

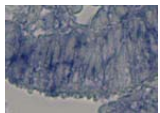

E8.5

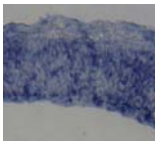

E9.5

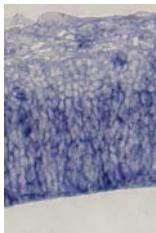

E11.5

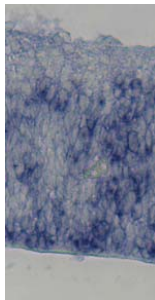

E13.5

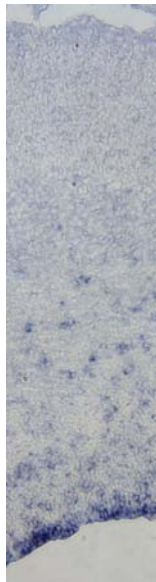

E15.5

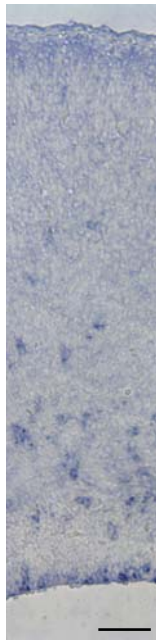

E17.5

Supplement: pnas_0604066103_1.pdf [file pnas_0604066103_1.pdf]

**Aspm** **$\gamma$ -tubulin****DNA****merge**

prometa

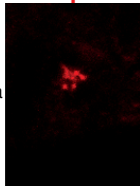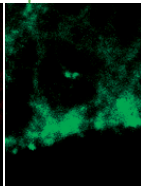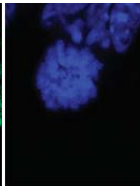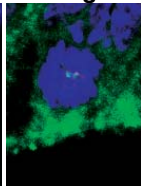

meta

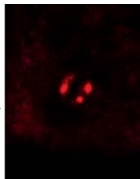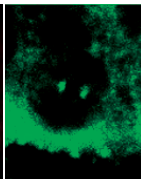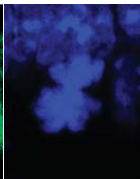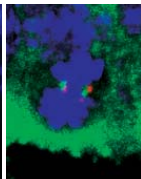

telo

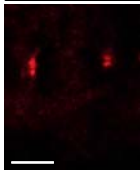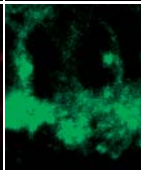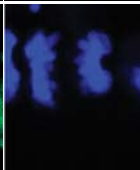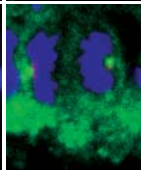

Supplement: pnas_0604066103_2.pdf [file pnas_0604066103_2.pdf]

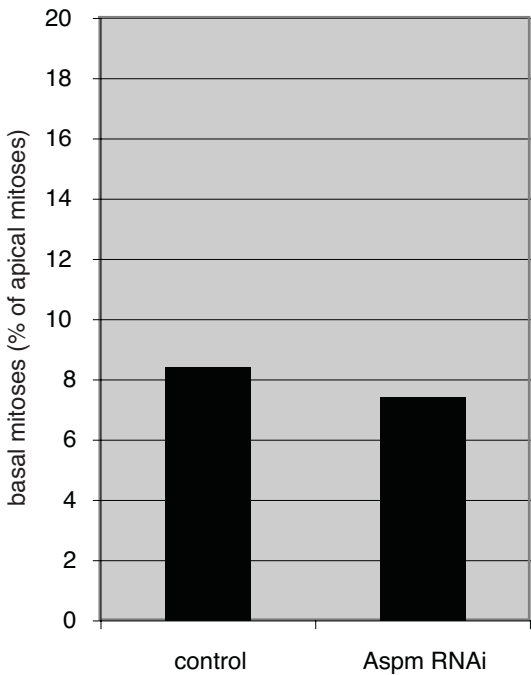

Supplement: pnas_0604066103_3.pdf [file pnas_0604066103_3.pdf]

DNA  $\gamma$ -tubulin

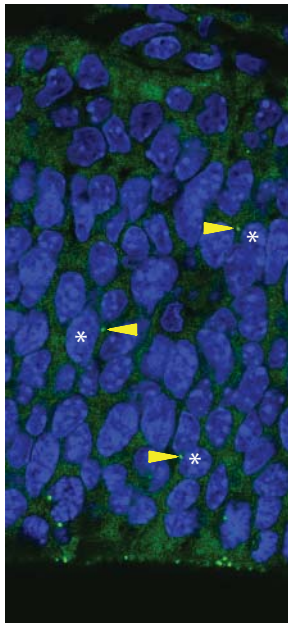

BrdU

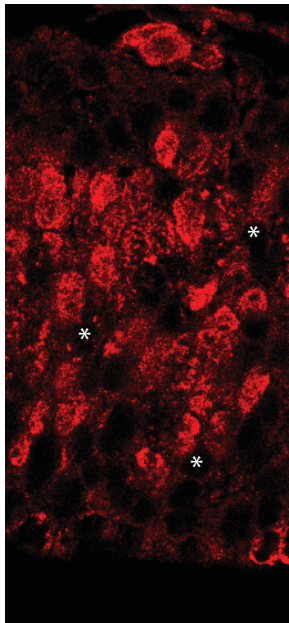

merge

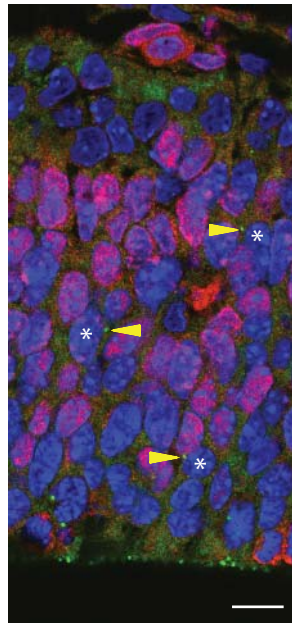

Supplement: pnas_0604066103_4.pdf [file pnas_0604066103_4.pdf]
